# Supplementary material for: Cardiovascular risk factor mapping and distribution among adults in Mukono and Buikwe districts in Uganda: small area analysis
Source: Springer Nature journal article supplement (doi:10.1186/s12872-020-01573-3), 2020-06-10

**Map of Mukon and Buikwe districts showing the overall weighted prevalence of hypertension by parish**

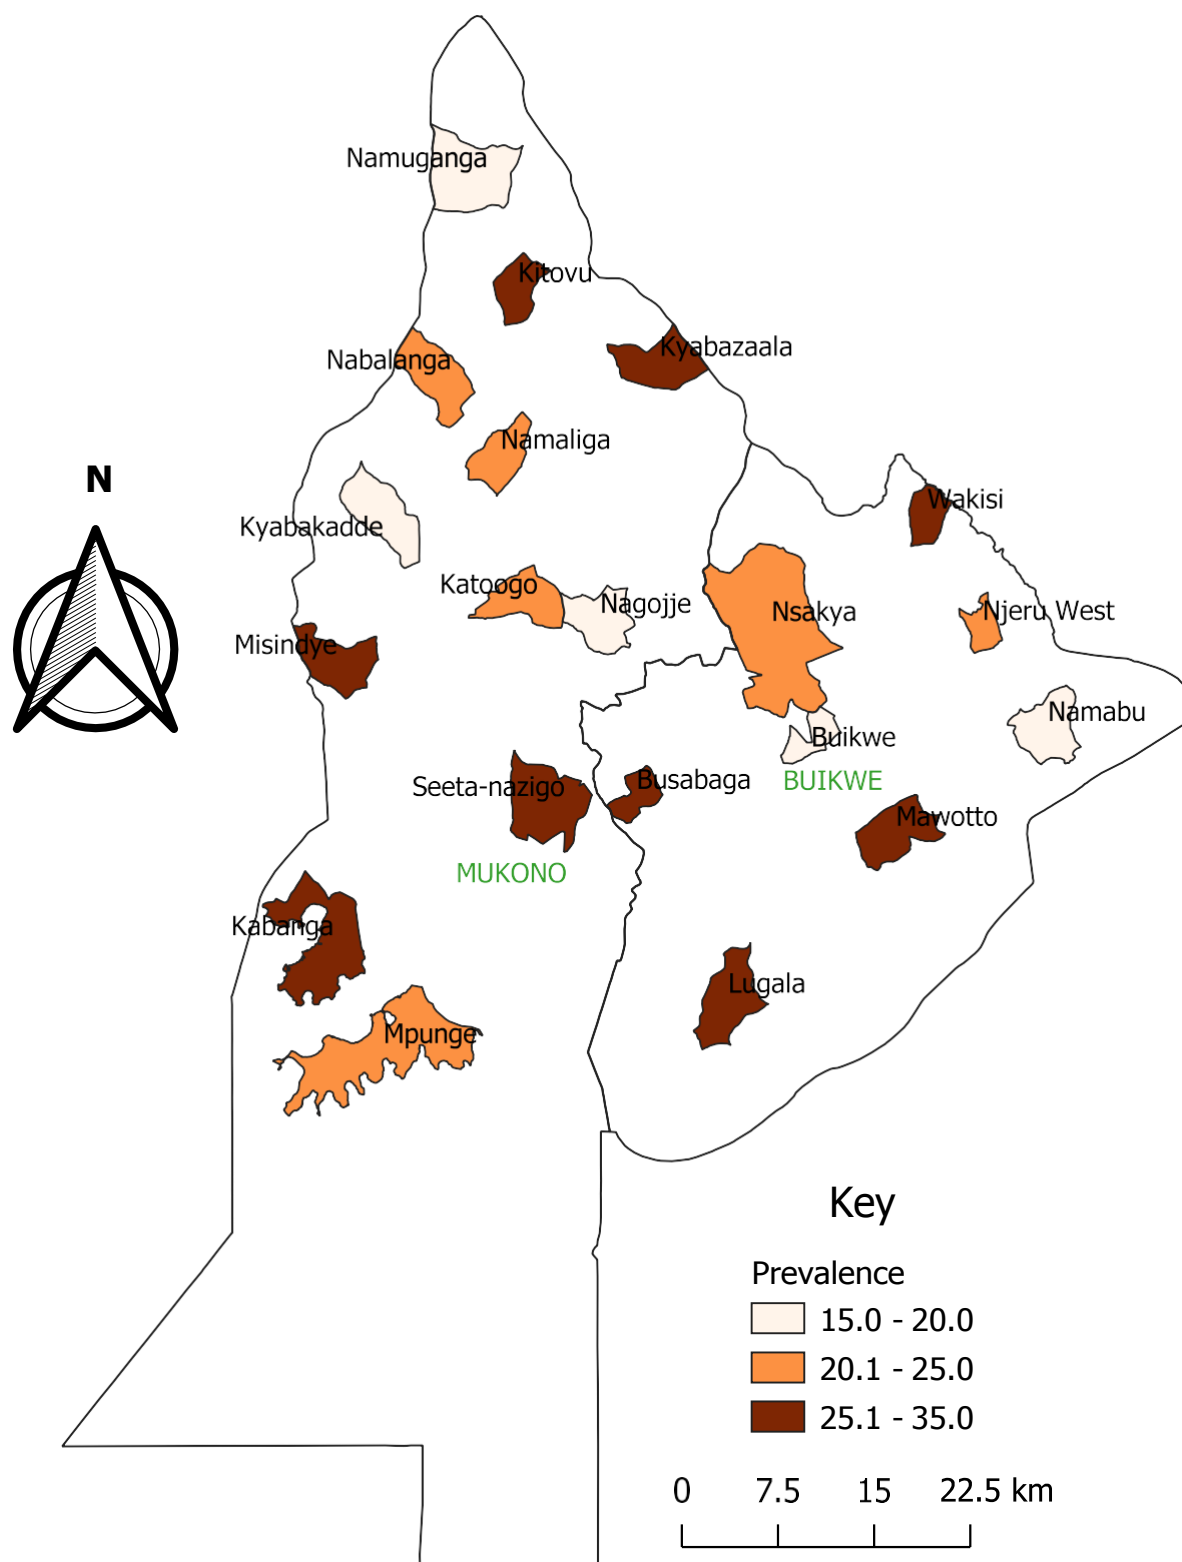

**Map of Mukono and Buikwe districts showing the weighted prevalence of hypertension among men by parish**

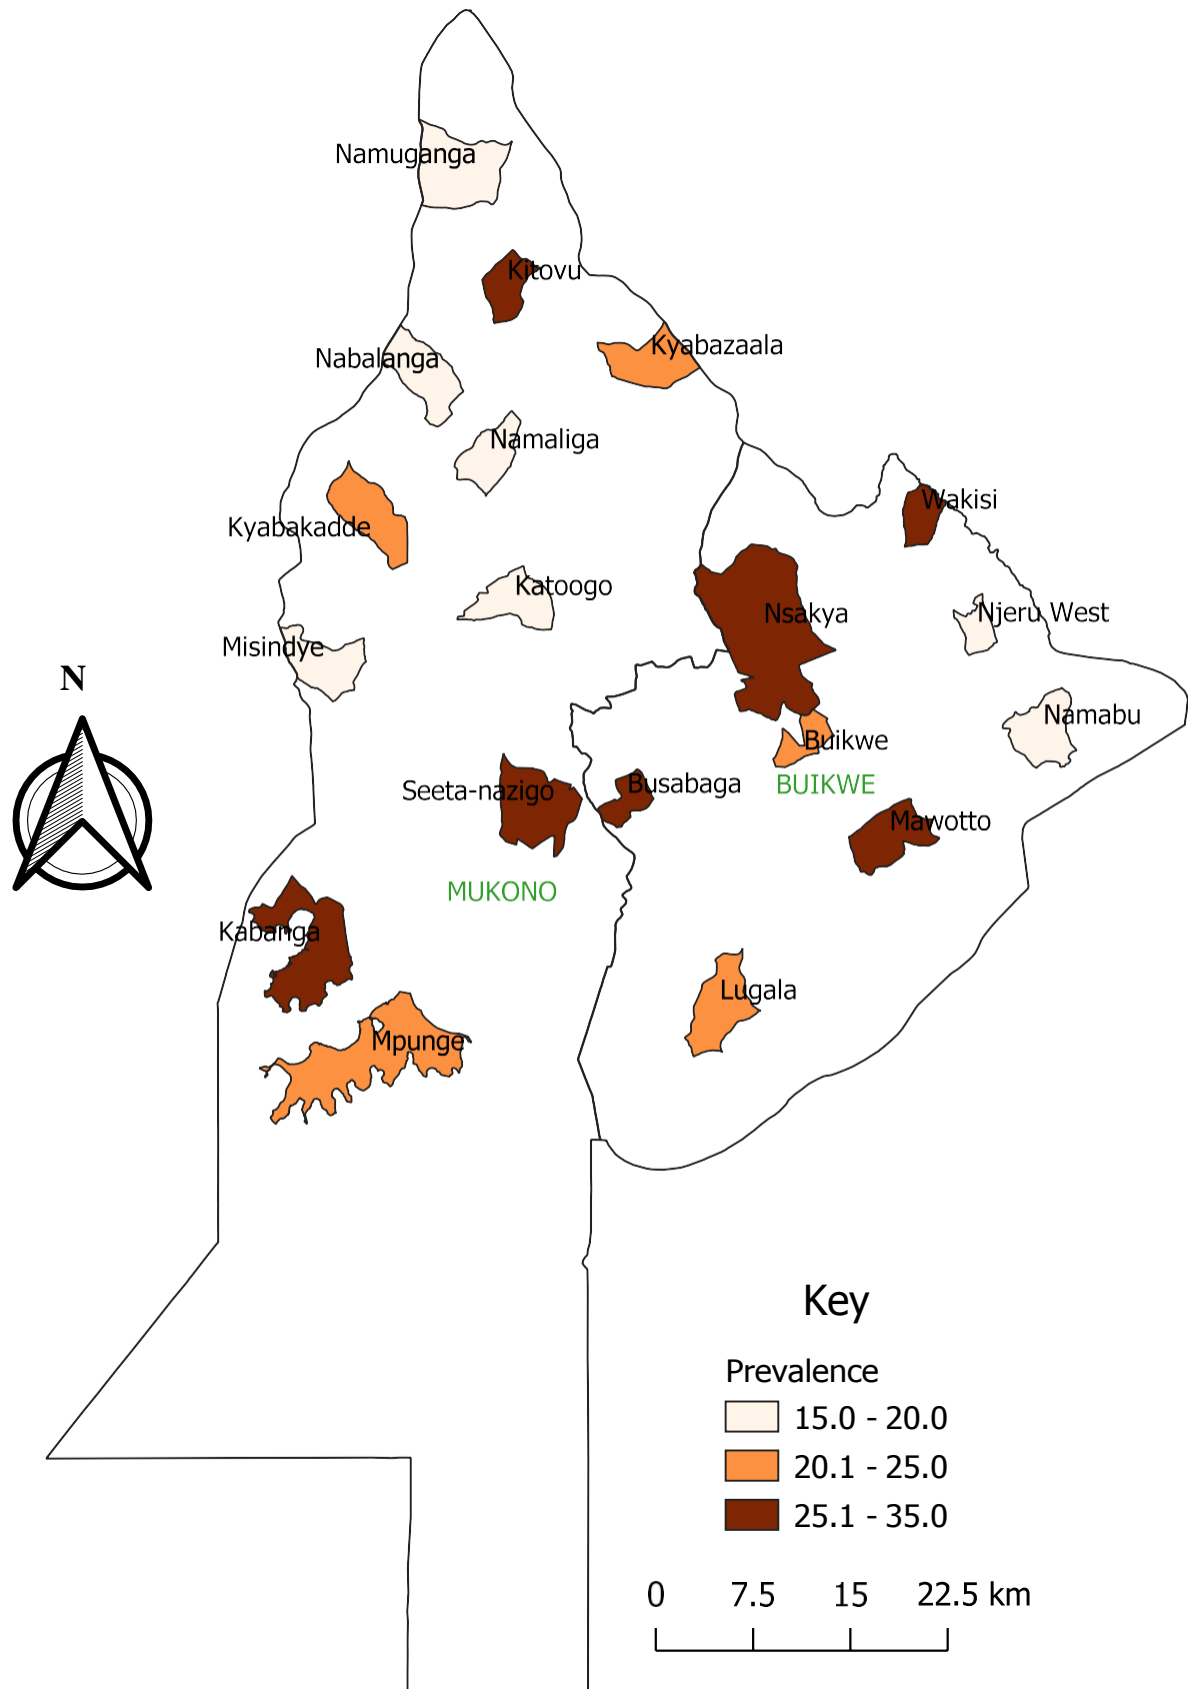

**Map of Mukono and Buikwe districts showing the weighted prevalence of hypertension among women**

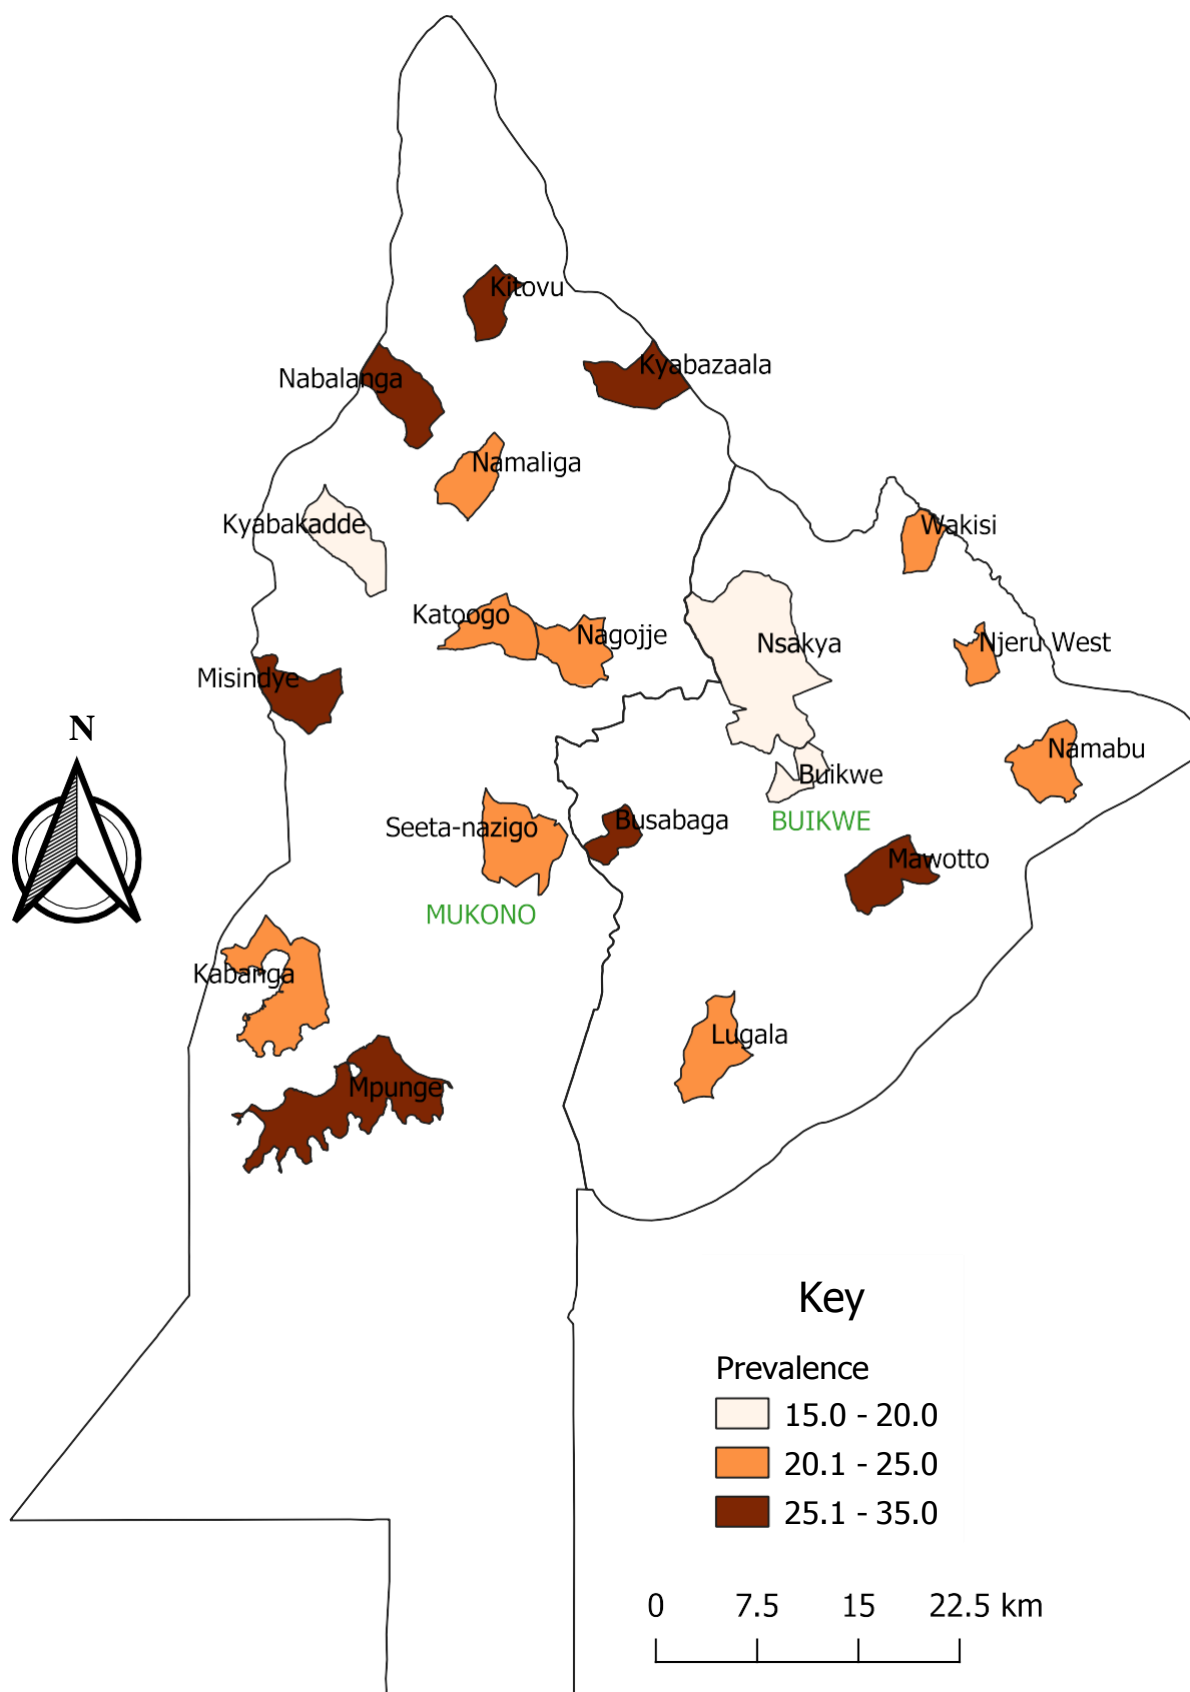

**Map of Mukono and Bbuikwe districts showing the overall weighted prevalence of obesity/ overweight by parish**

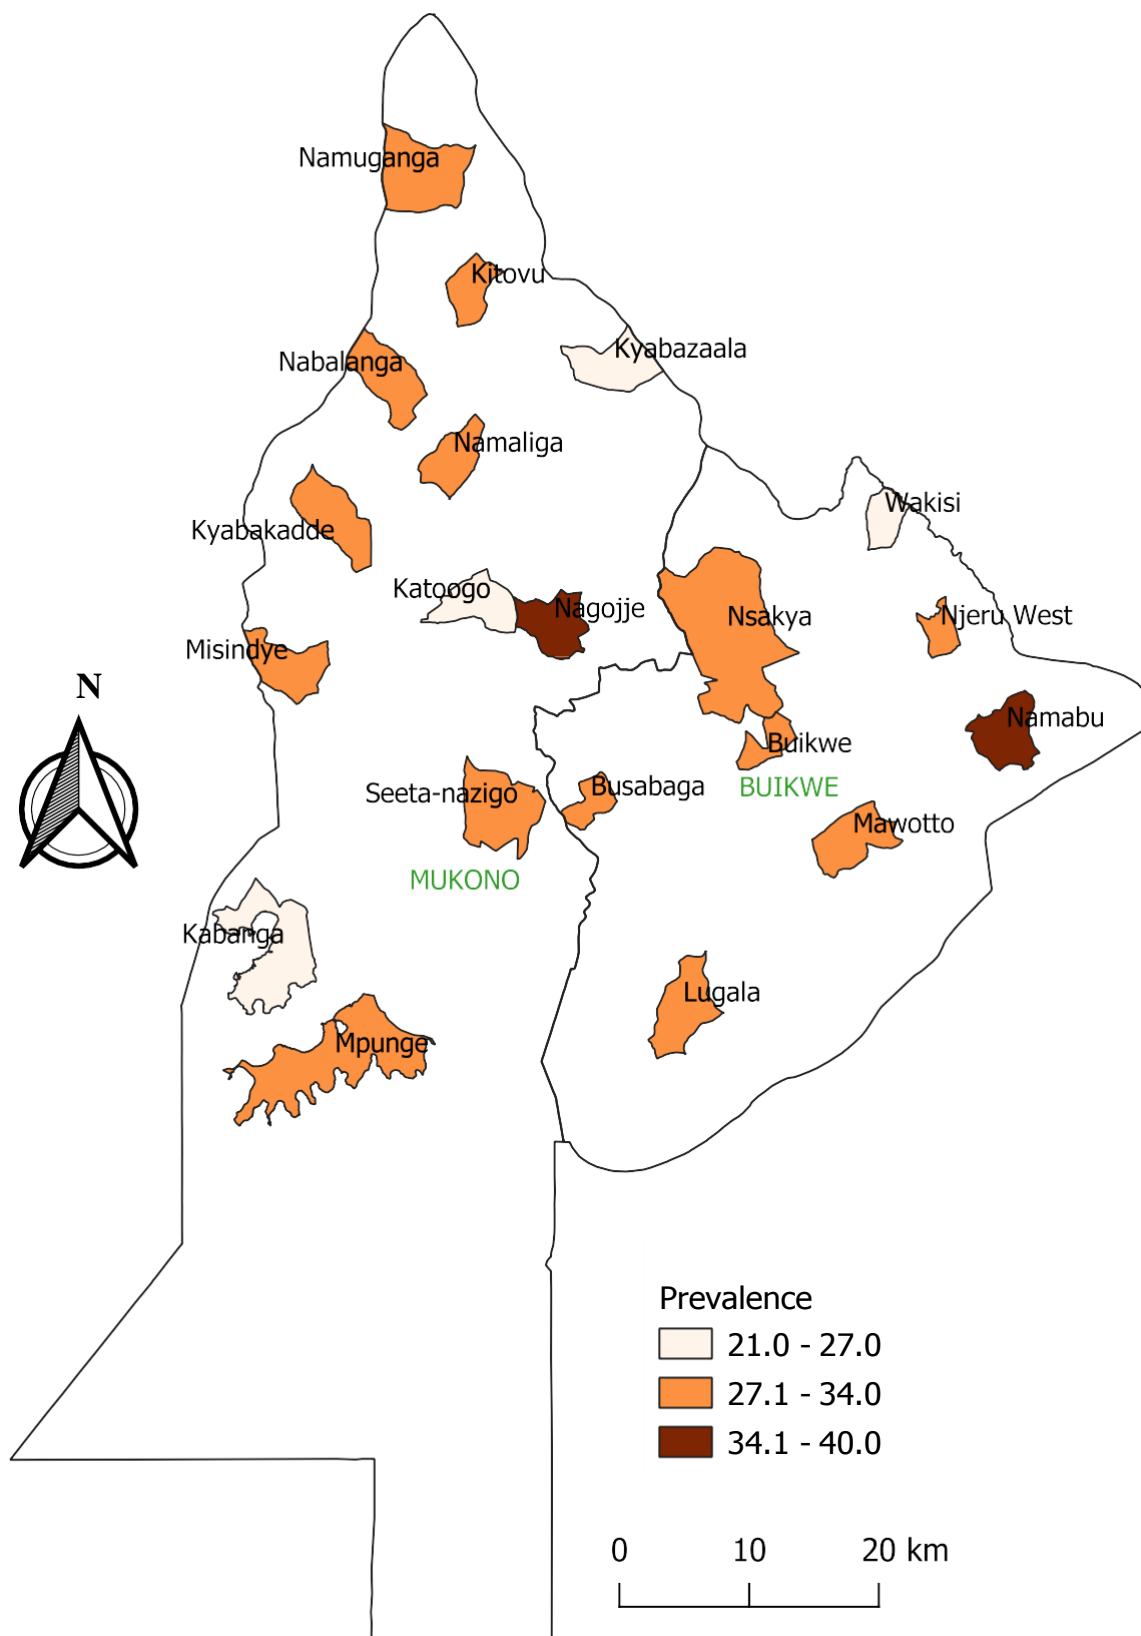

**Map of Mukono and Buikwe districts showing the weighted prevalence of obesity/  
overweight among men**

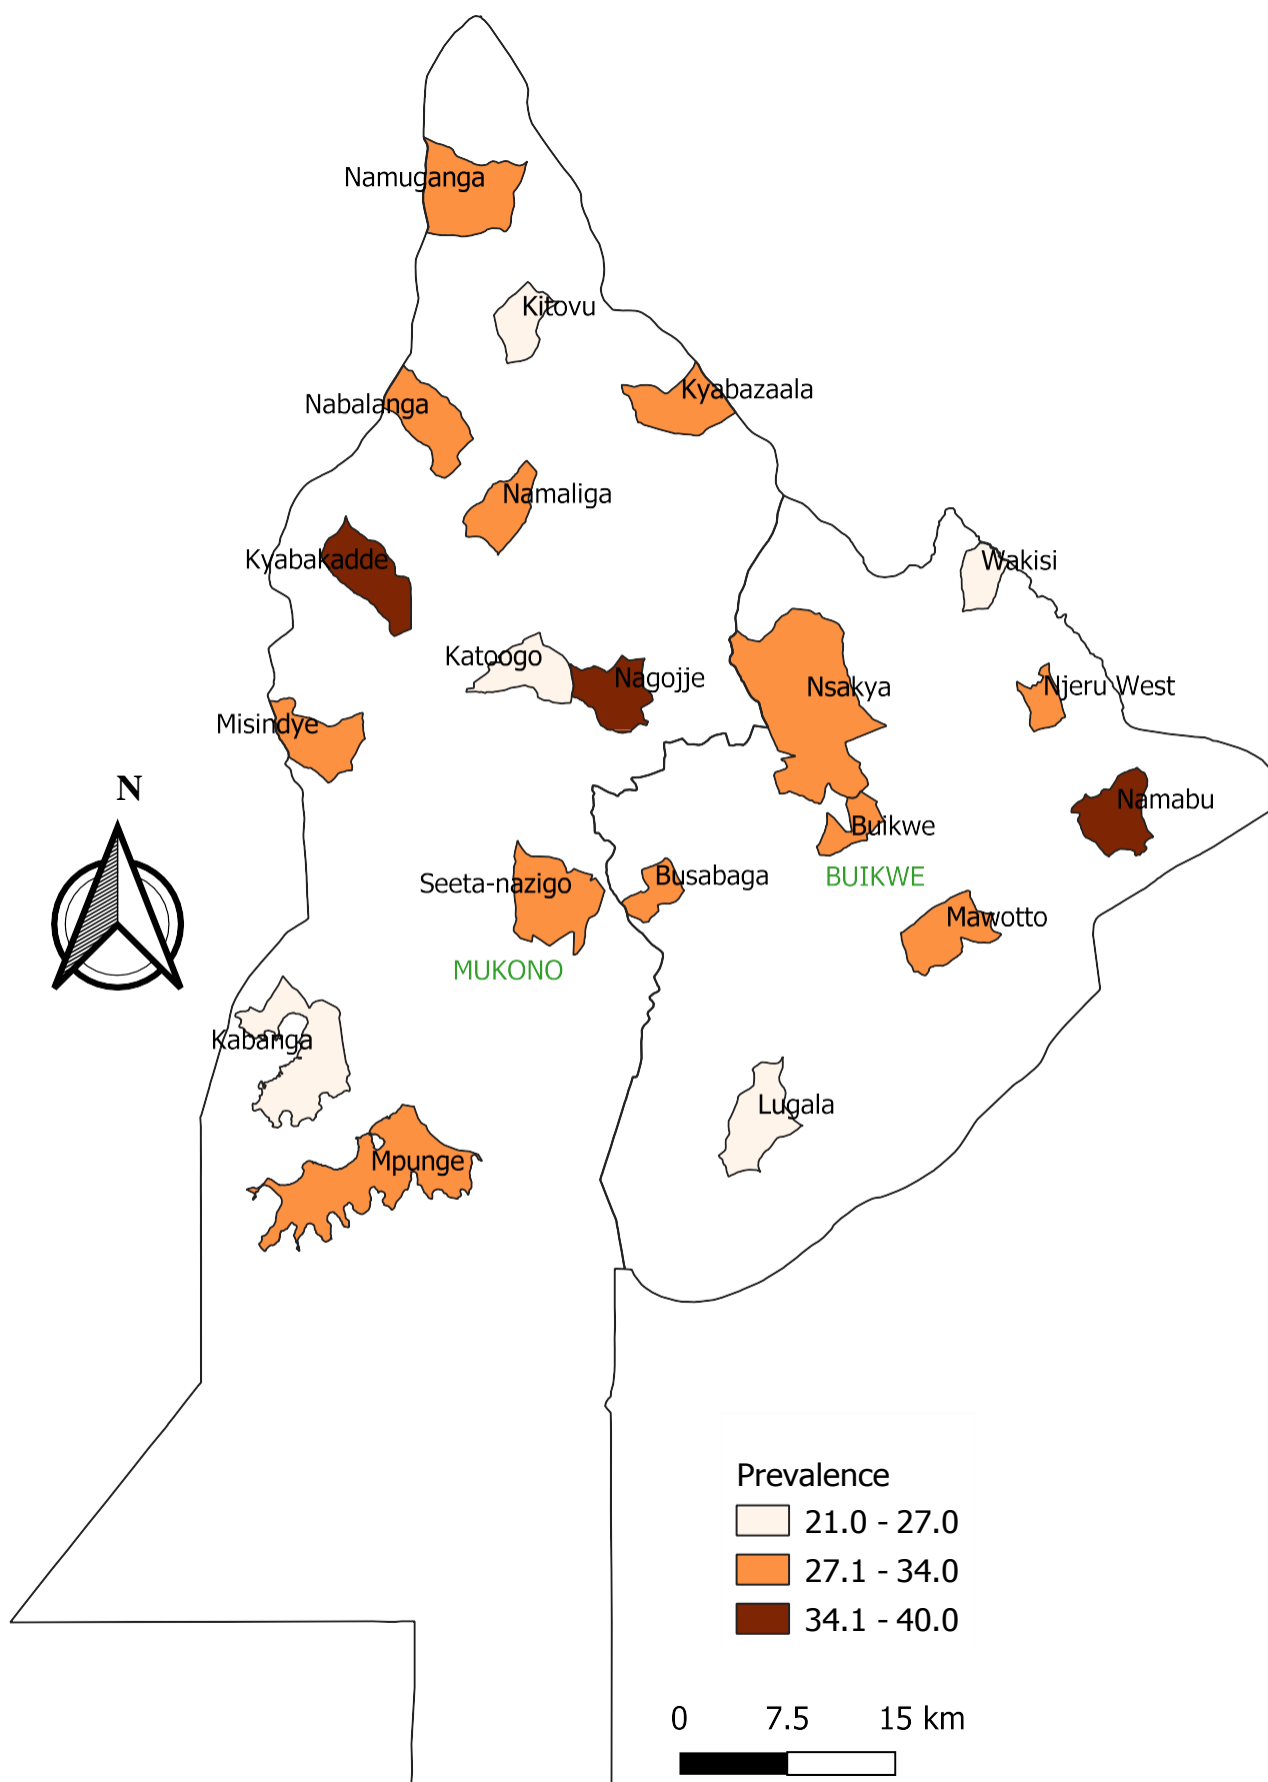

**Map of Mukono and Buikwe districts showing the prevalence of obesity/ over weight among women by parish**

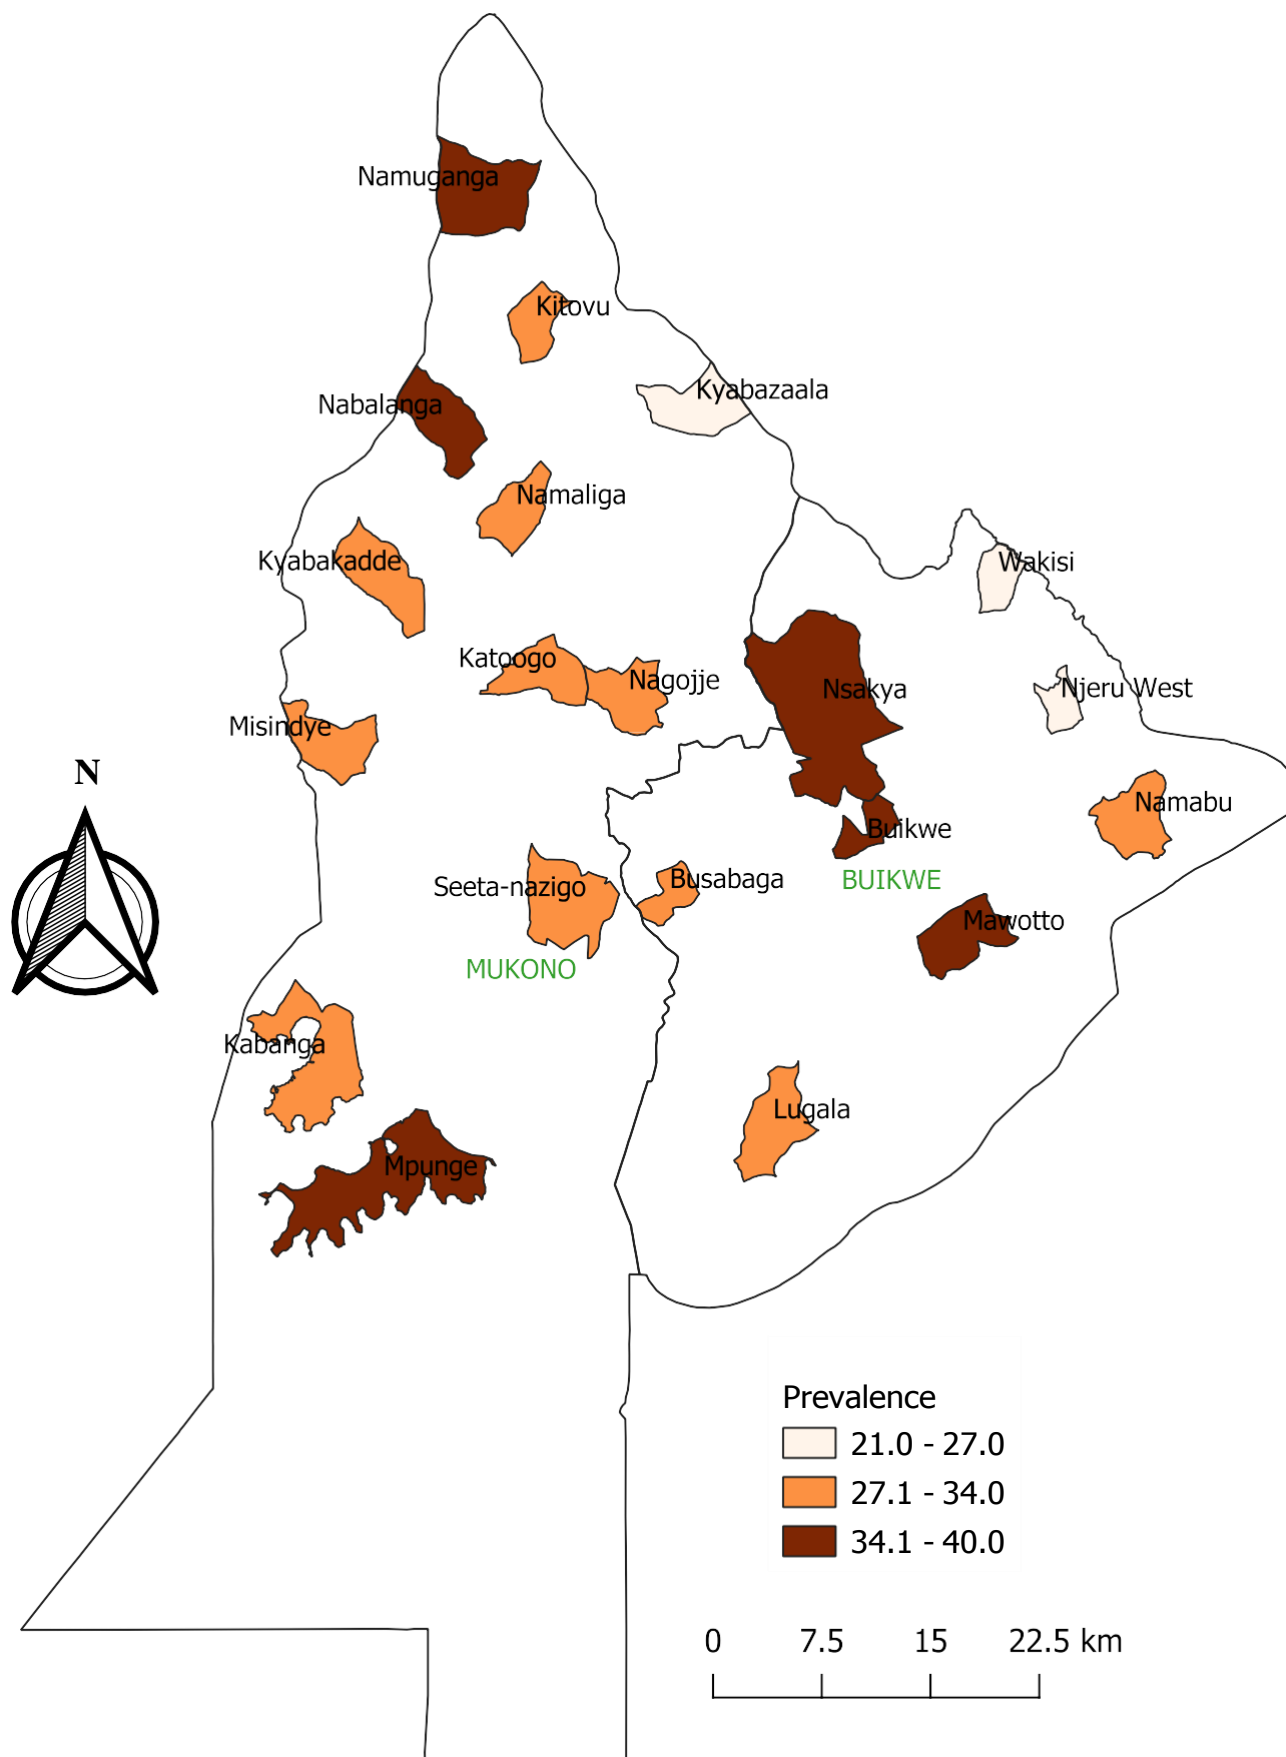

**Map of Mukono and Buikwe districts showing the overall weighted prevalence of physical inactivity**

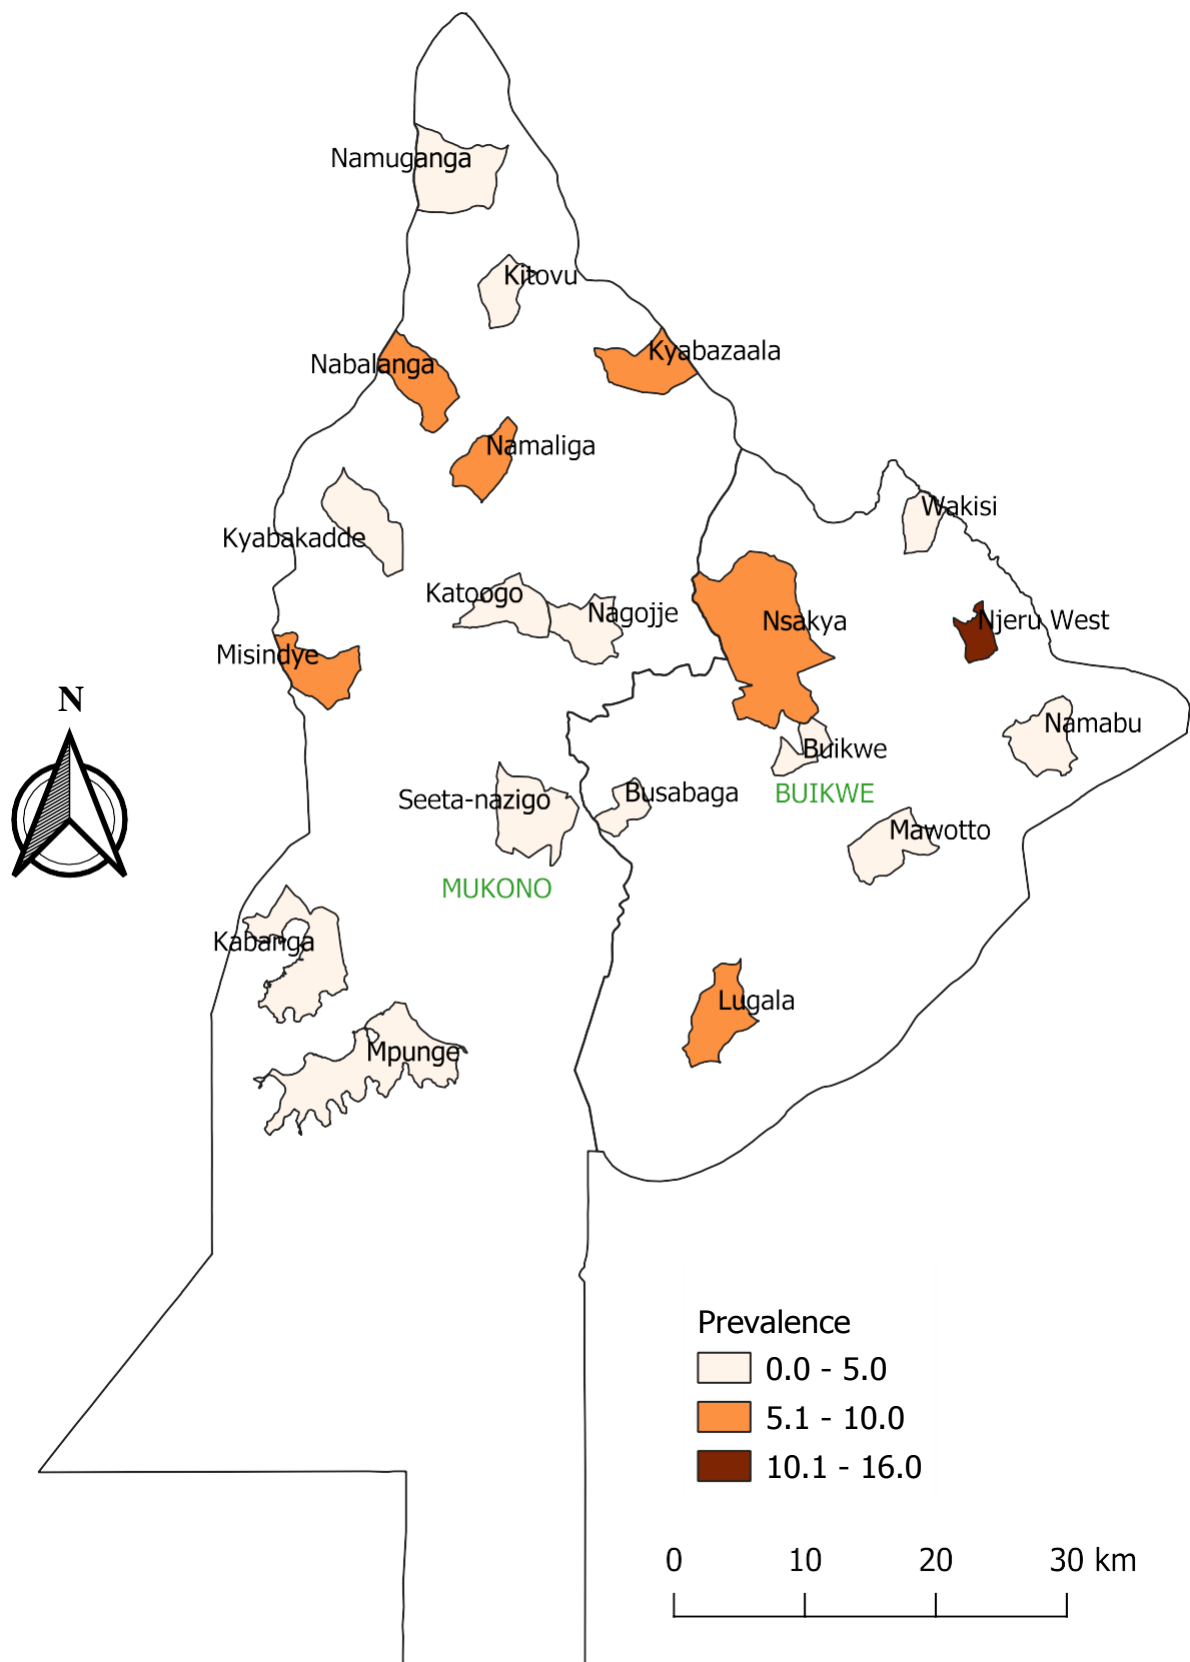

**Map of Mukono and Buikwe districts showing the weighted prevalence of physical inactivity among men by parish**

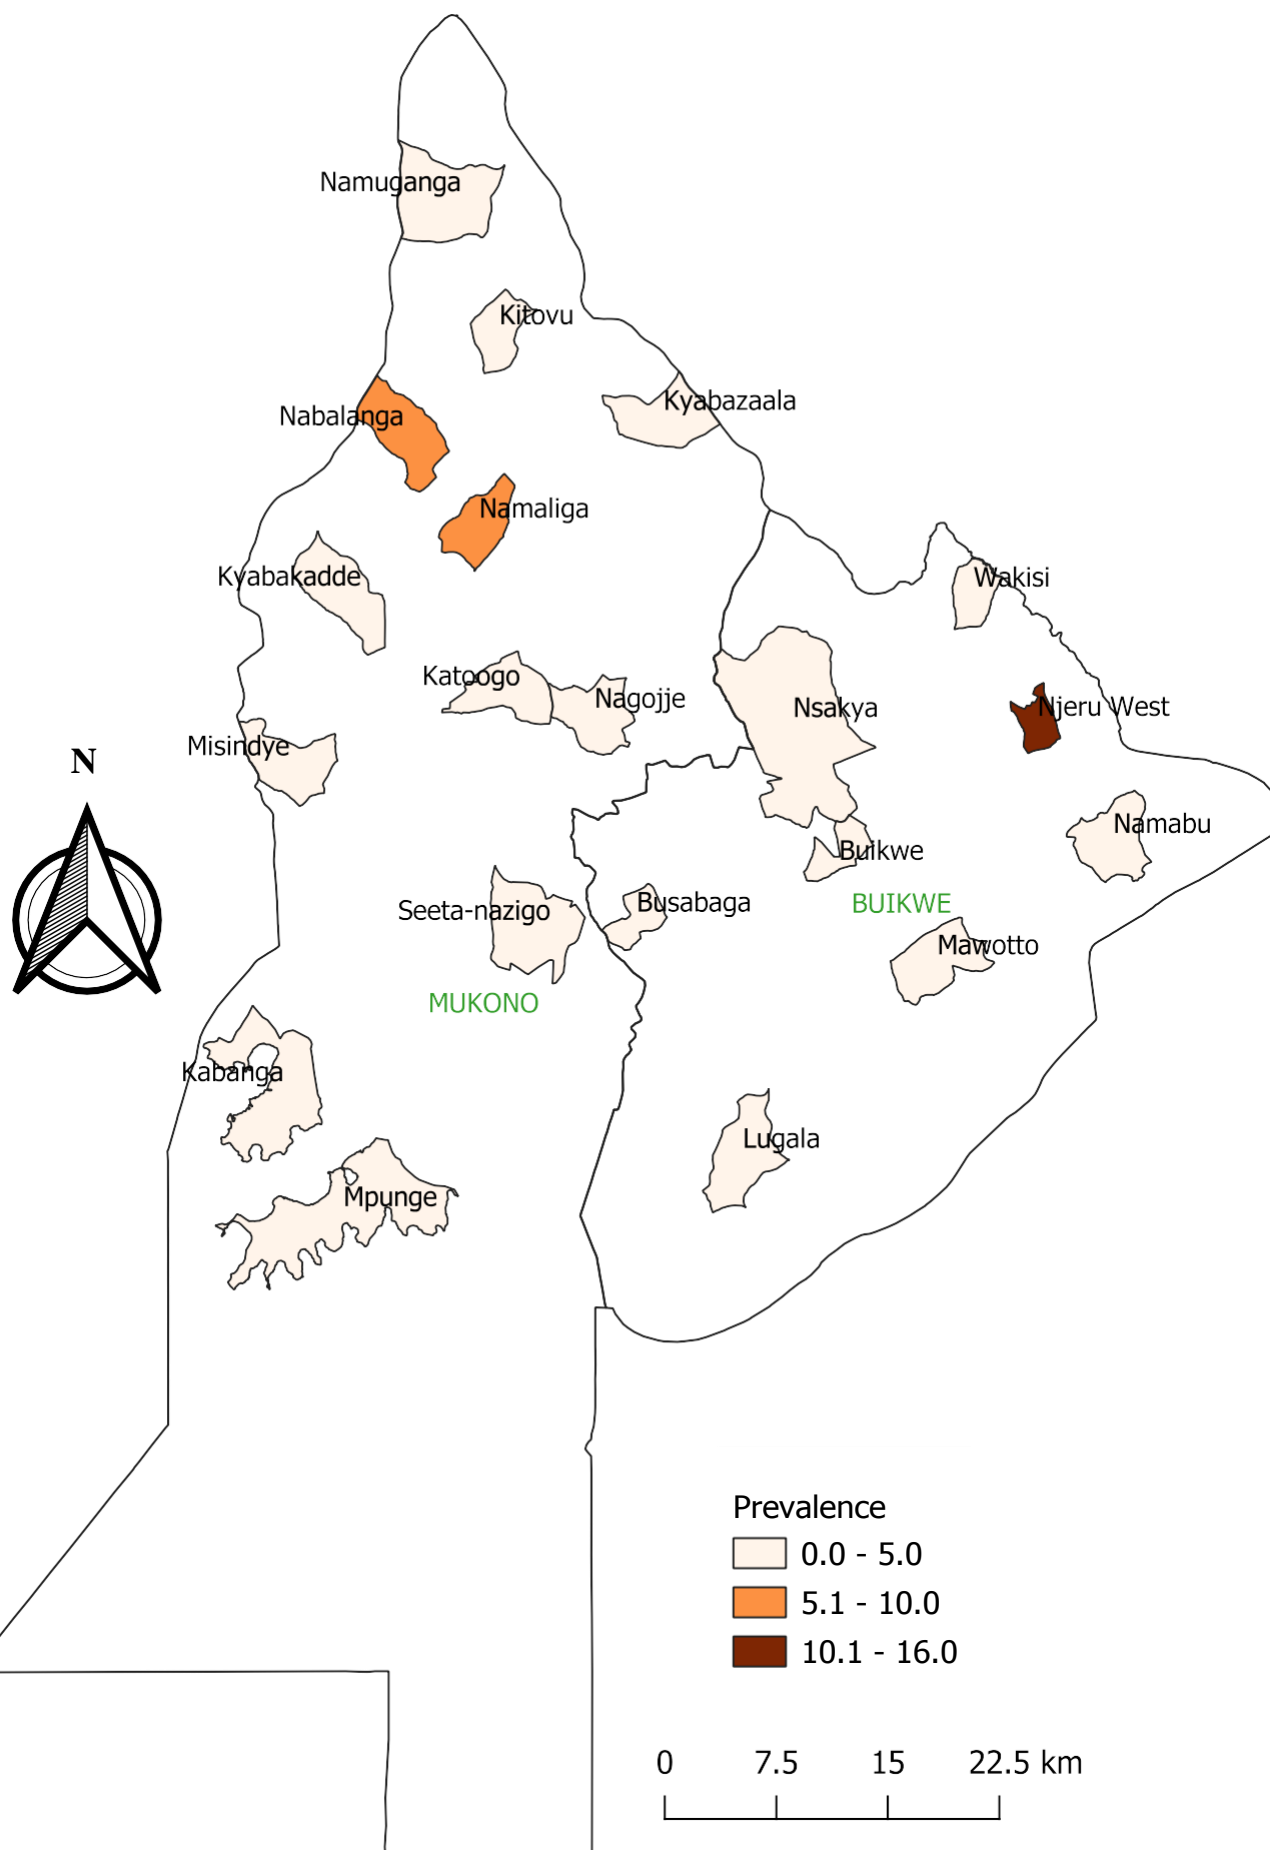



**Map of Mukono and Buikwe districts showing the prevalence of physical inactivity among women by parish**

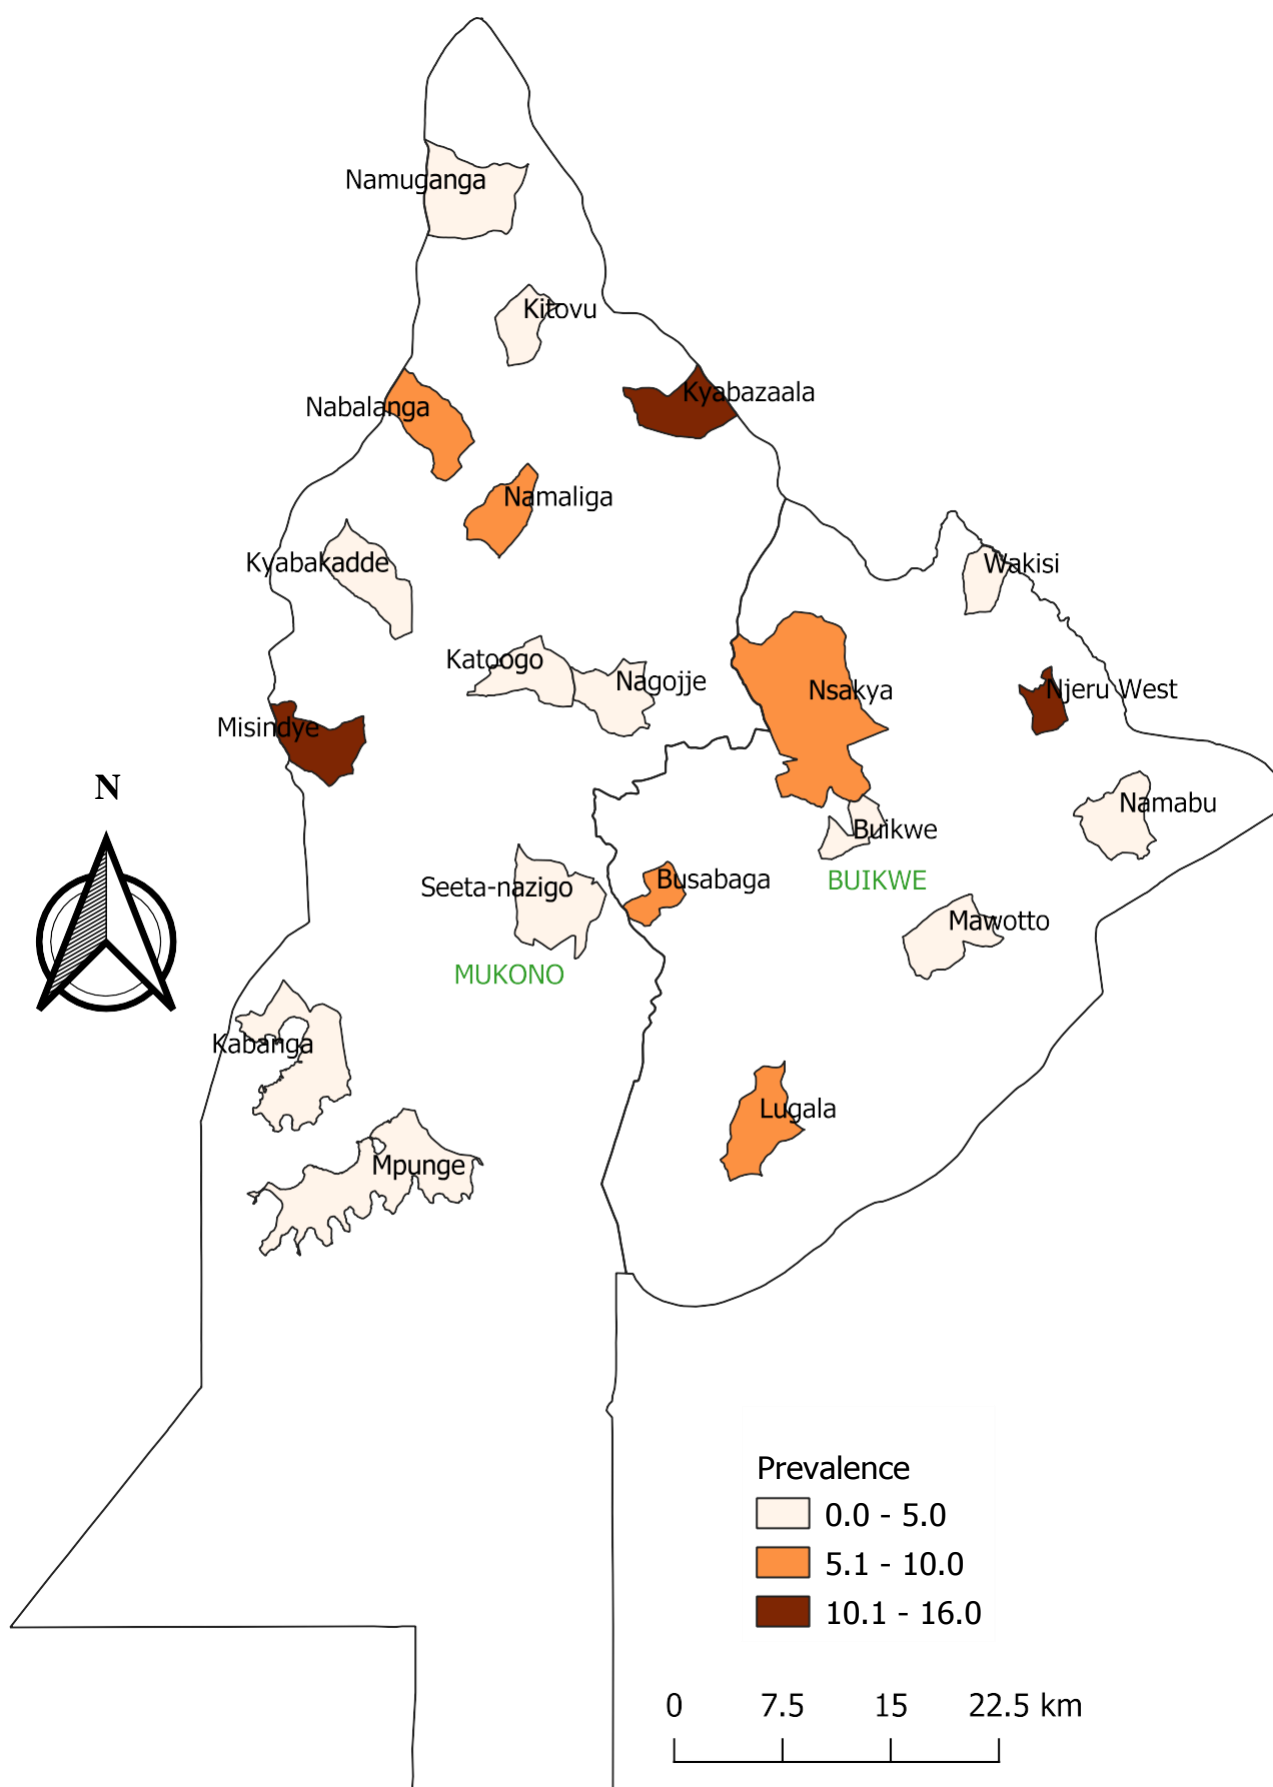

**Map of Mukono and Buikwe districts showing the overall weighted prevalence of smoking by parish**

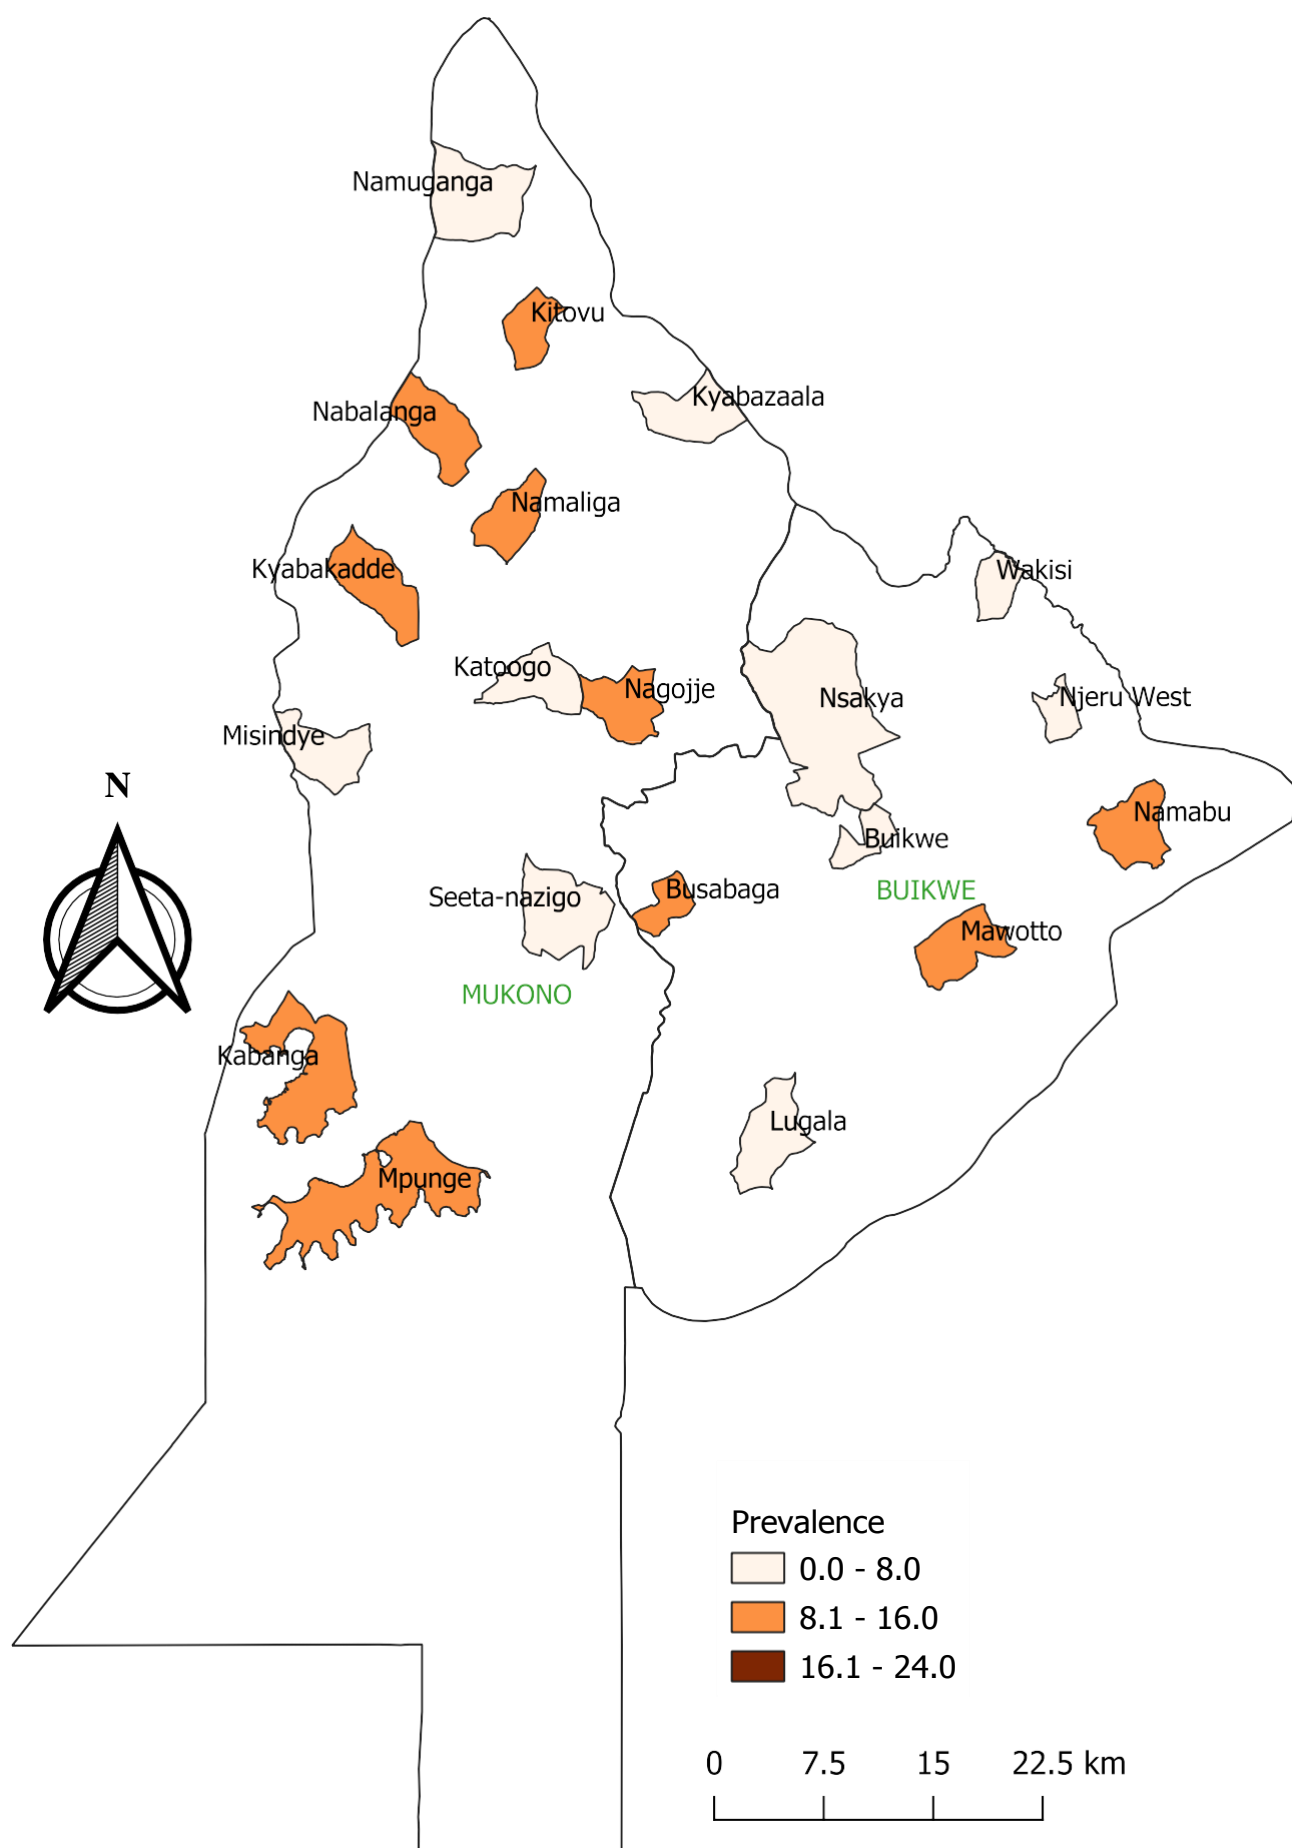

**Map of Mukono and Buikwe districts showing the weighted prevalence of smoking among men by parish**

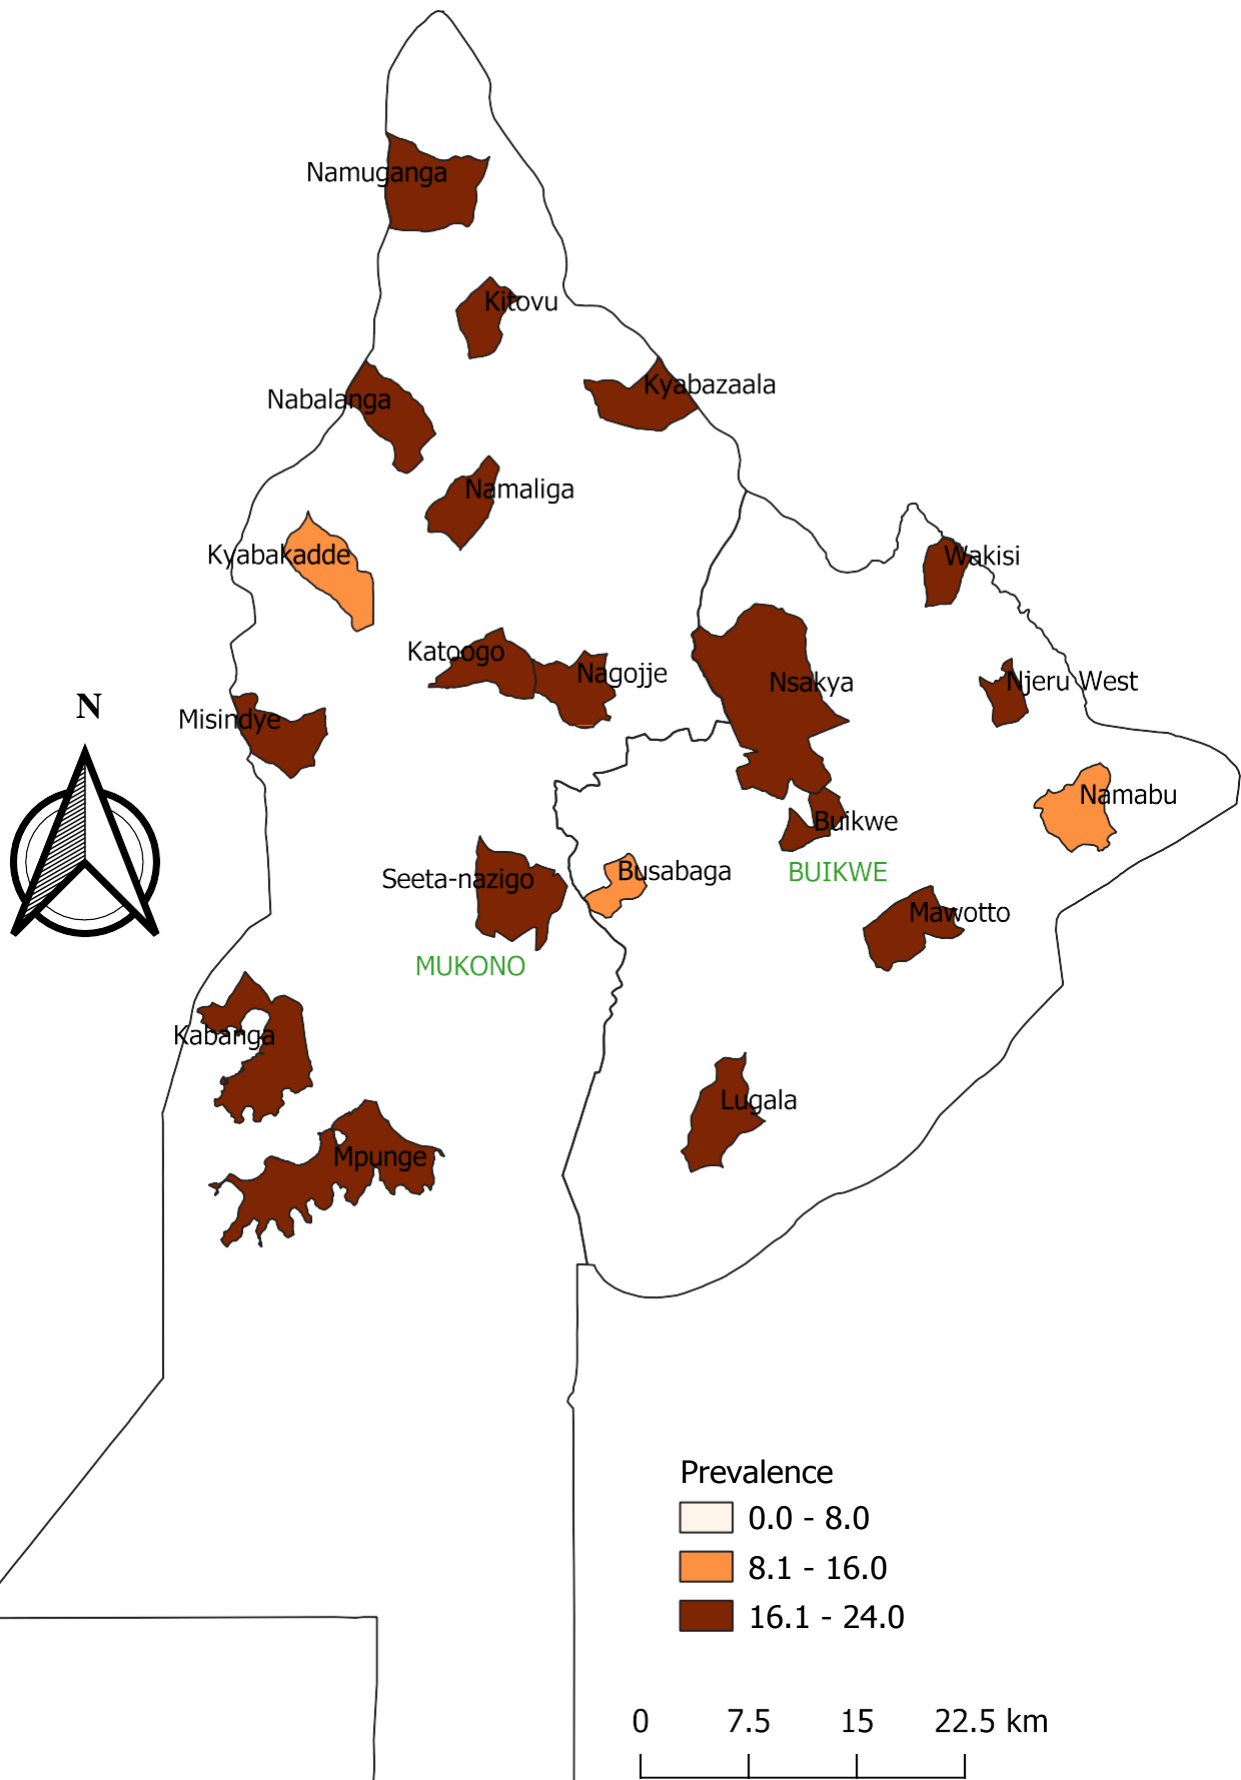

**Map of Mukono and Buikwe districts showing the weighted prevalence of smoking among women by parish**

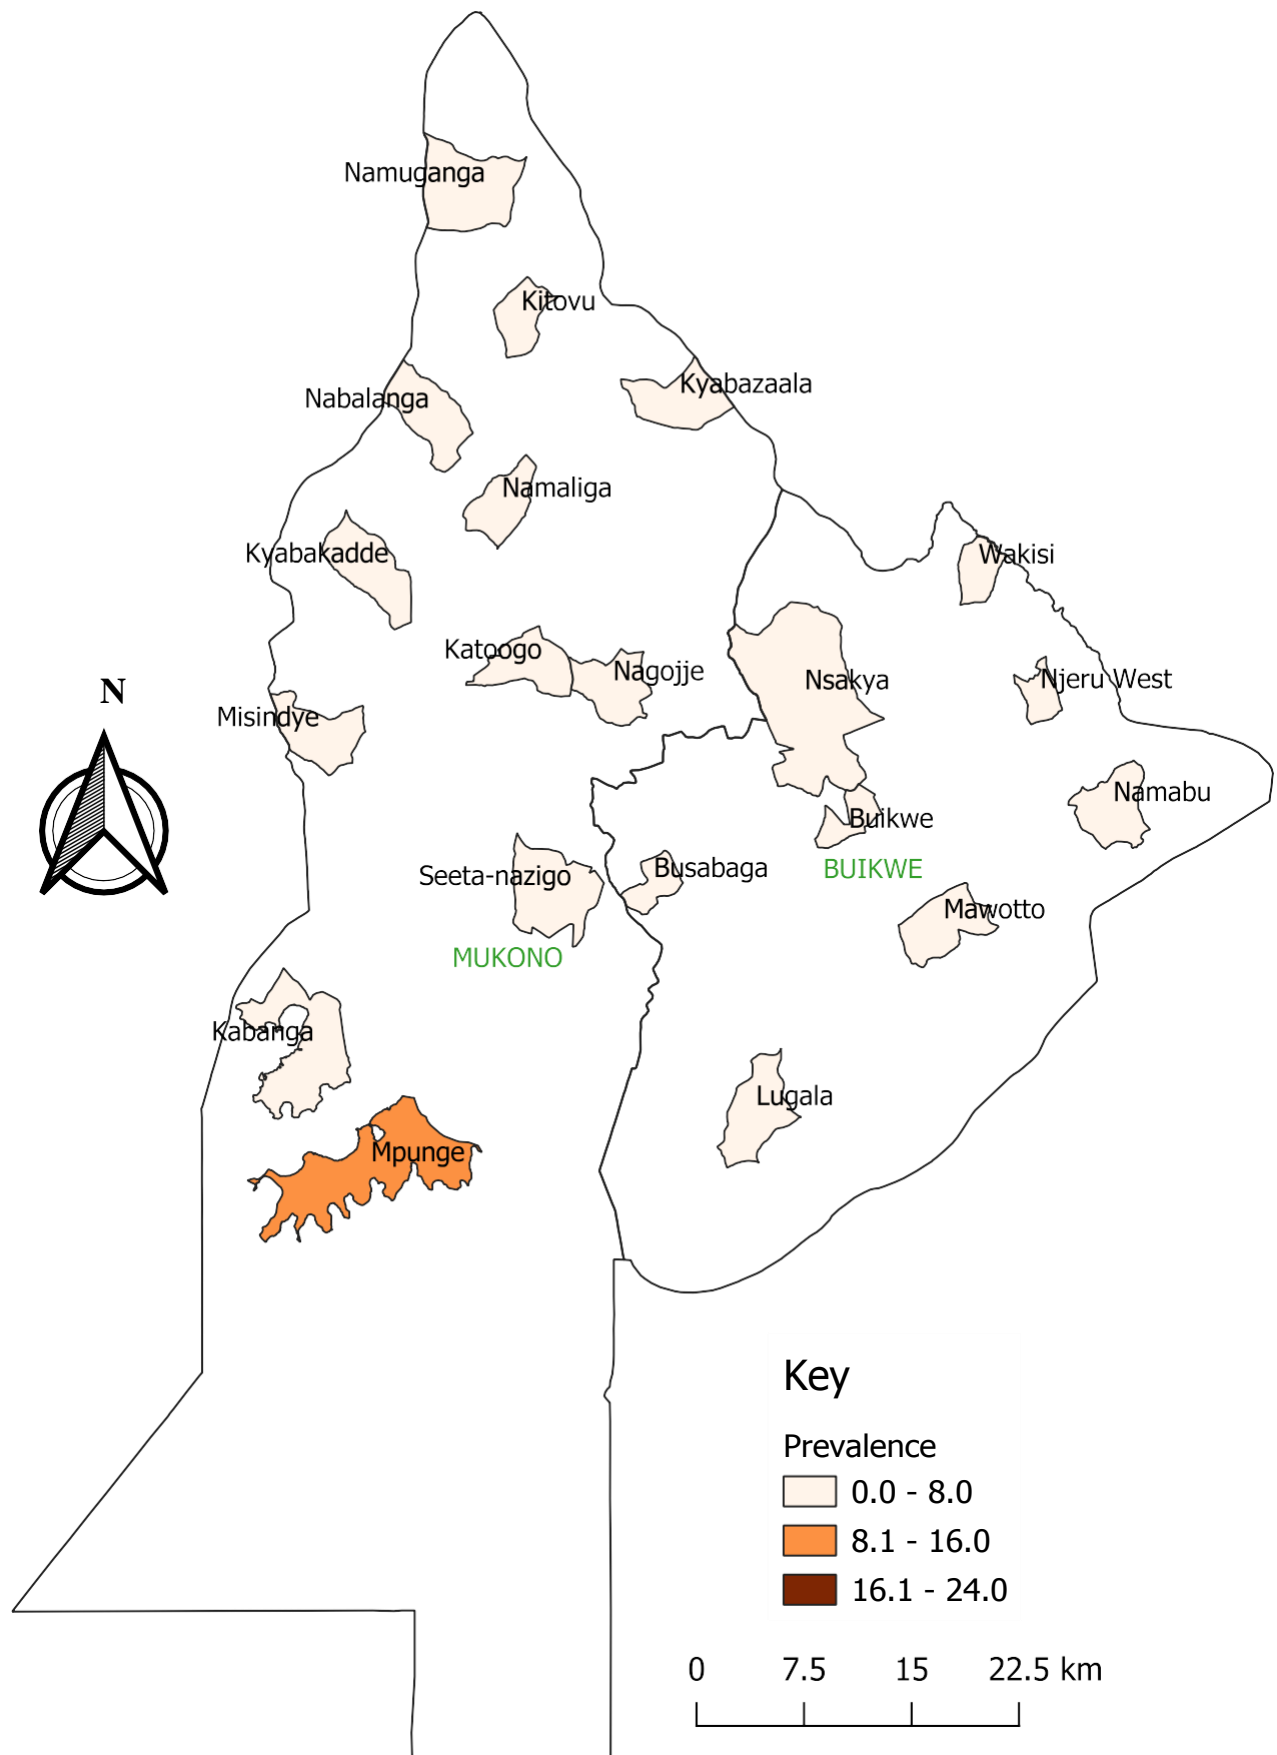

**Map of Mukono and Buikwe districts showing the overall weighted prevalence of alcohol consumption by parish**

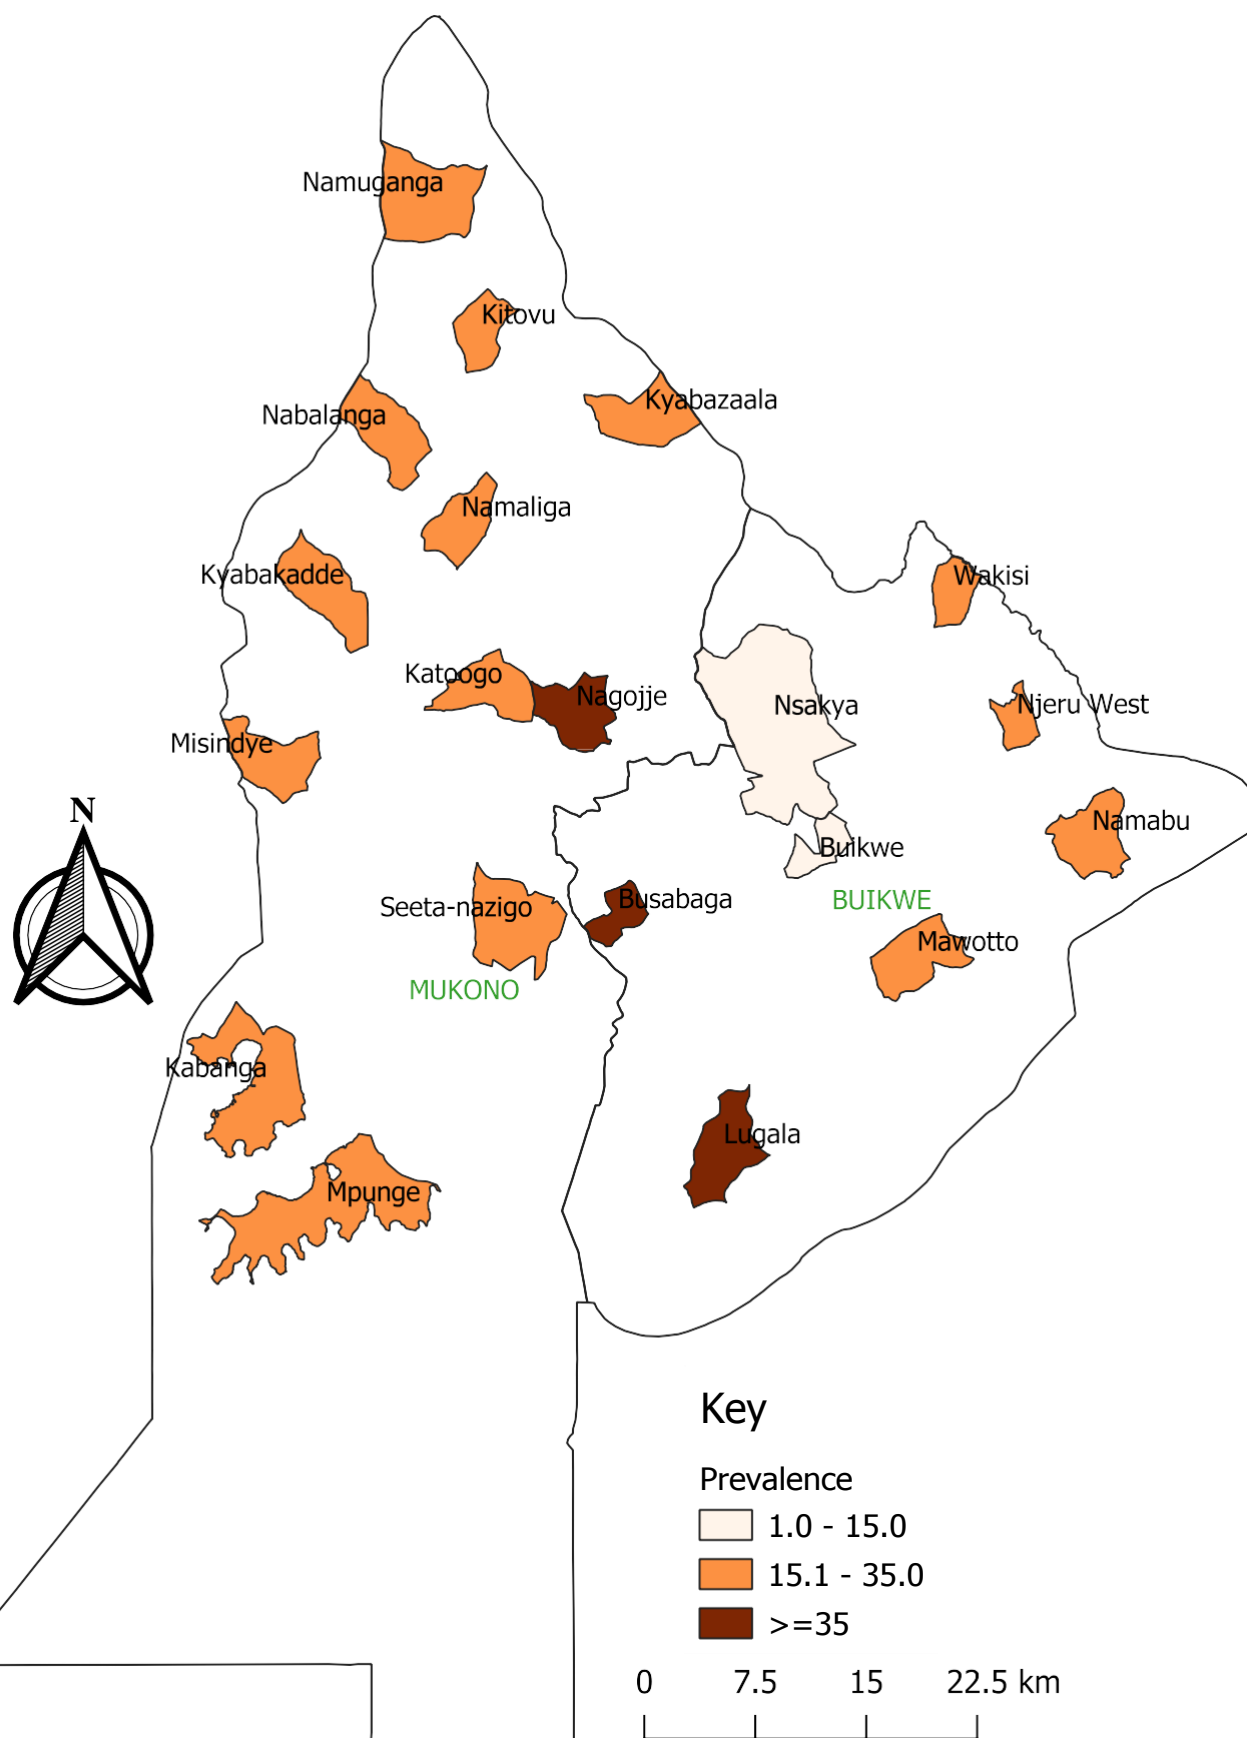

**Map of Mukono and BUikwe districts showing the weighted prevalence of alcohol consumption among men by parish**

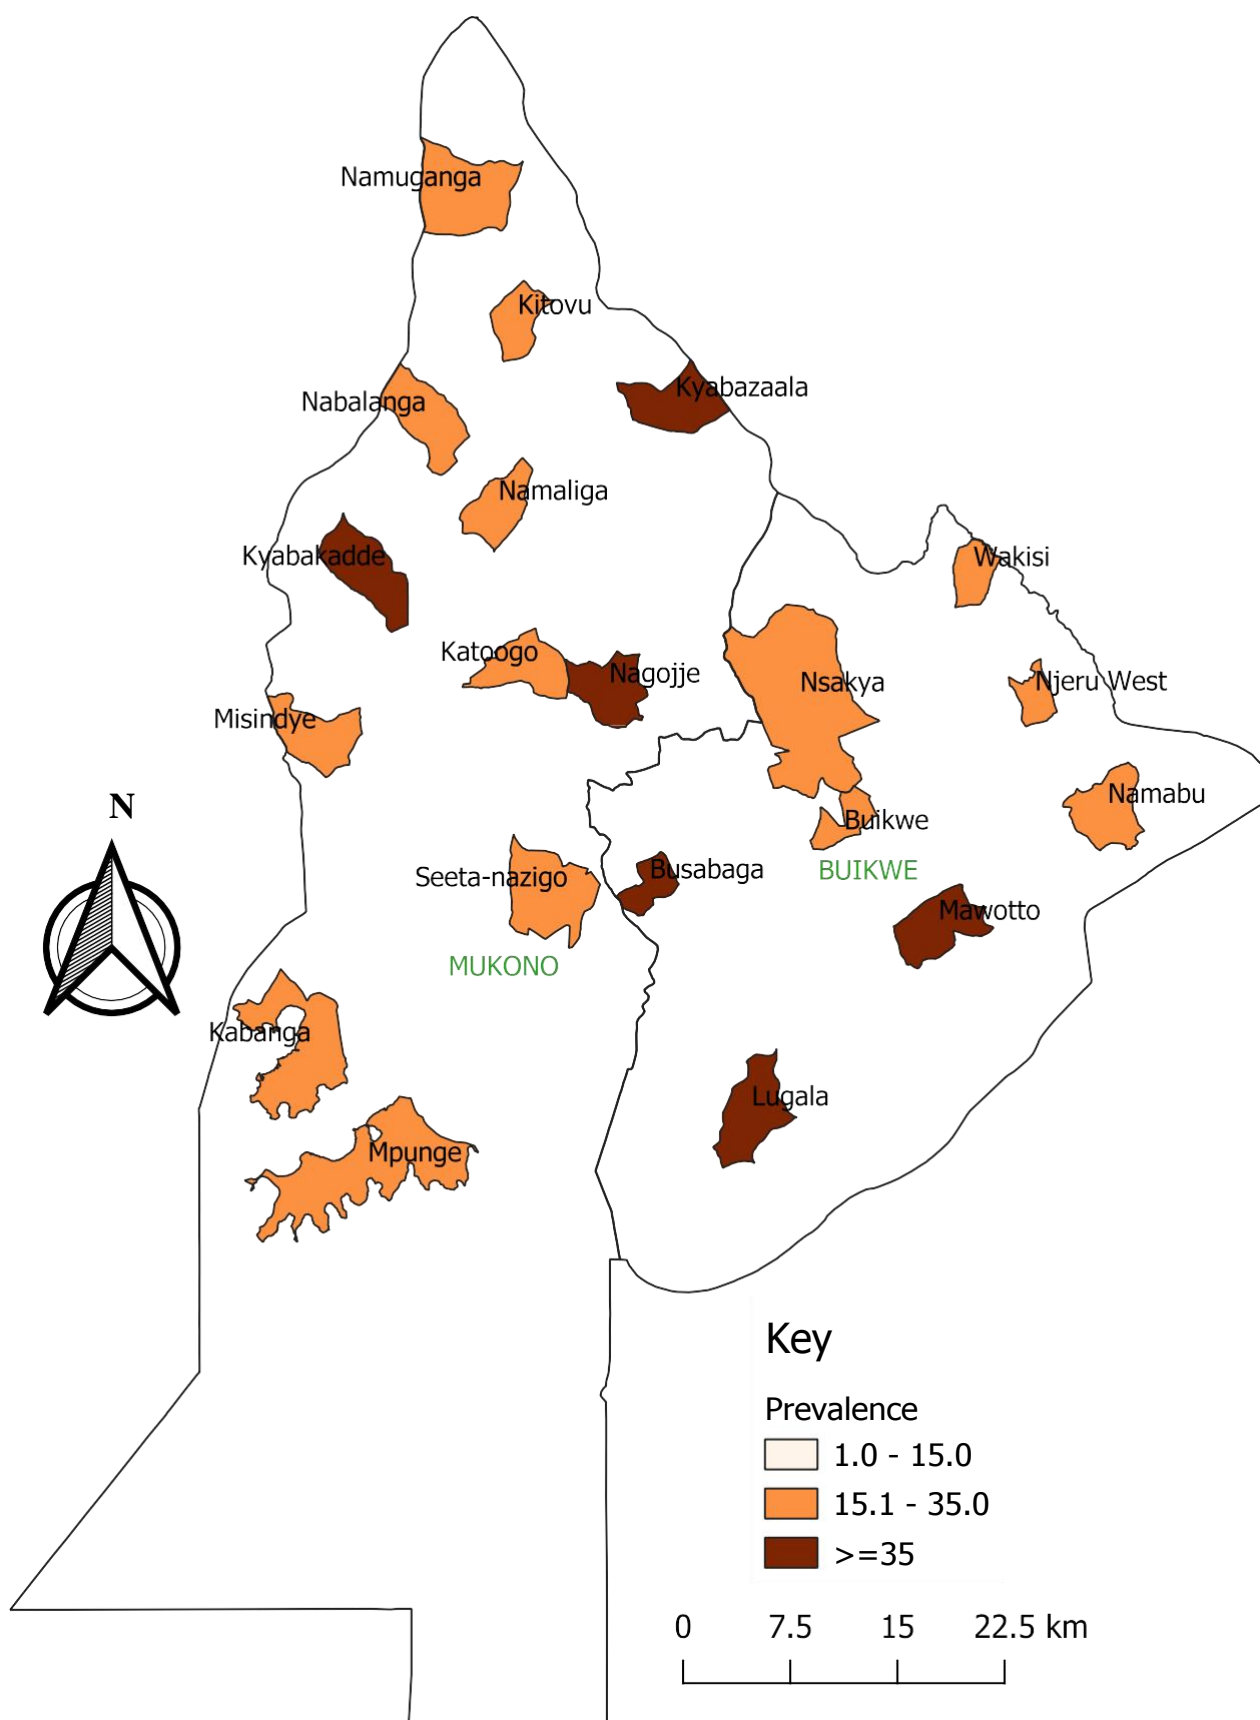

**Map of Mukono and Buikwe districts showing the weighted prevalence of alcohol consumption among women by parish**

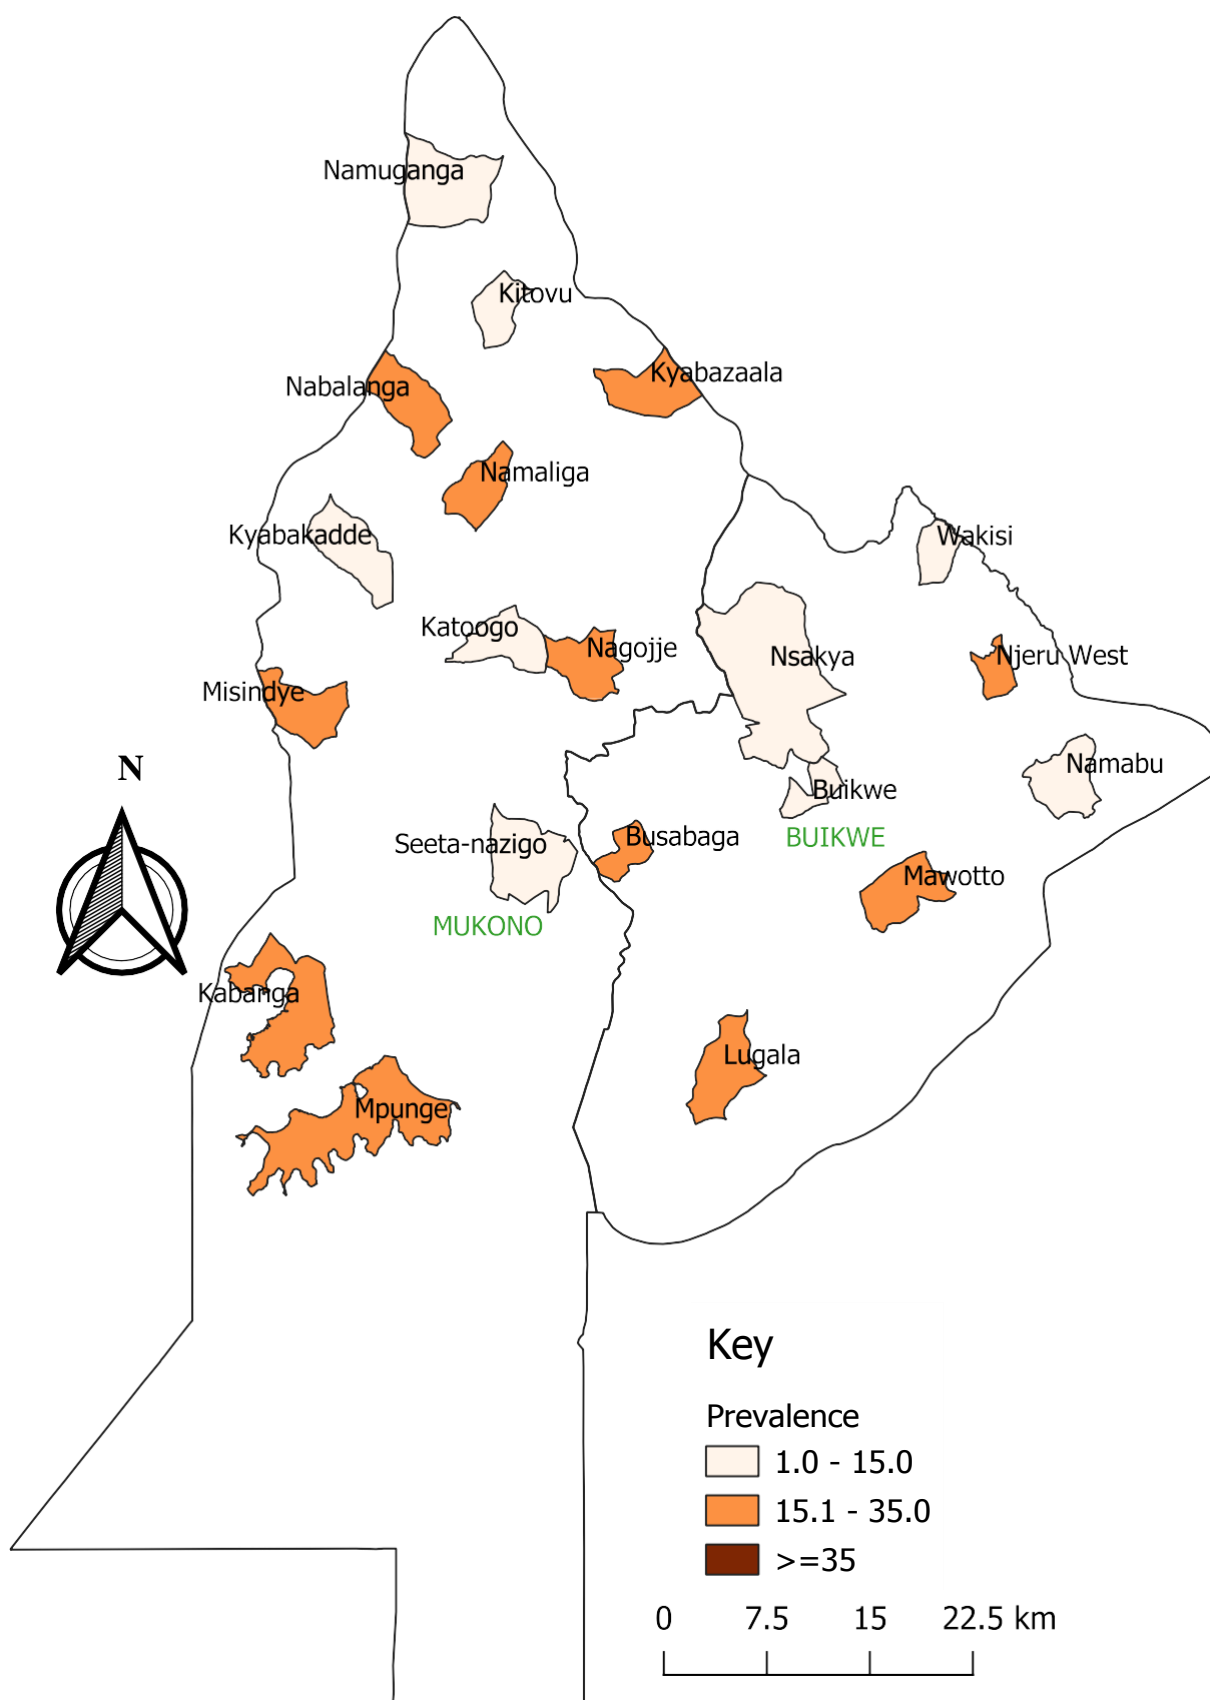

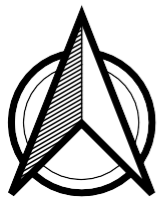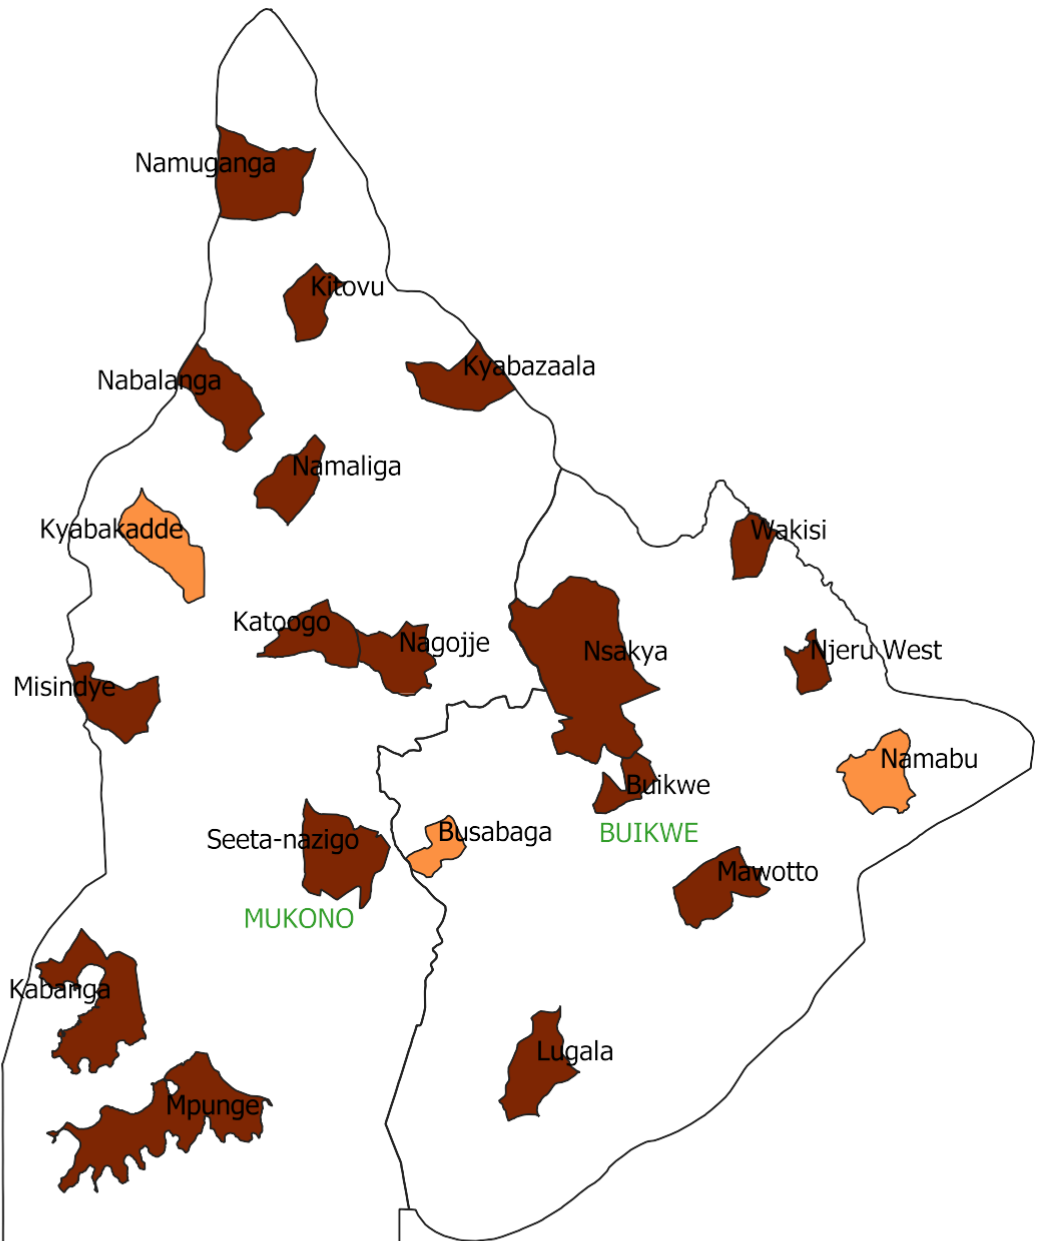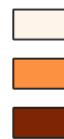

0 7.5 15 22.5 km

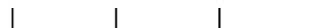

Supplement: MOESM7 [file 18070208]
